# Supplementary material for: A Realist Review of Violence Prevention Education in Healthcare
Source: PubMed Central journal article supplement (PMC8002651; doi:10.3390/healthcare9030339), 2021-03-17
Supplement: healthcare-09-00339-s001.pdf [file healthcare-09-00339-s001.pdf]

**Table S1.** Glossary of terms.

|                                              |                                                                                                                                                                                                                                                                                                                                                                                                                                                                                                                                                                                                                         |
|----------------------------------------------|-------------------------------------------------------------------------------------------------------------------------------------------------------------------------------------------------------------------------------------------------------------------------------------------------------------------------------------------------------------------------------------------------------------------------------------------------------------------------------------------------------------------------------------------------------------------------------------------------------------------------|
| CMOs, CMO explanations or CMO configurations | a realist description of the contexts, mechanisms and outcomes used in Pawson and Tilley's [1] applied realism approach to review and evaluation that explain how and why programs and policies work                                                                                                                                                                                                                                                                                                                                                                                                                    |
| Context                                      | the characteristics of both settings and individuals that can shape how individuals reason in response to programs or resources. Characteristics include - but are not limited to - existing policies, practices, social rules, norms, beliefs, attitudes, material and social structures, and interrelationships Social settings are open systems, and as such, contexts are not static and evolve over time. In addition to affecting the attitudes and reasoning of individuals, contexts can also affect whether the required resources are available to implement action towards the intervention's objective [2]. |
| Initial program theory                       | the beginning theory about how a program or intervention is likely to work that forms the starting point for realist research                                                                                                                                                                                                                                                                                                                                                                                                                                                                                           |
| Mechanism                                    | An underlying reasoning, belief system, process, or structure that operates in particular contexts to contribute to outcomes. Mechanisms are usually hidden, are sensitive to variations in context, and generate outcomes when they are activated [3]                                                                                                                                                                                                                                                                                                                                                                  |
| Outcome                                      | The result or effect of a program or policy such as violence prevention education. Outcomes can be intended or unintended, observable such as a behaviour, or less tangible such as increased confidence or knowledge. Outcomes close in time and space to the intervention may be referred to as "proximal" outcomes while longer-term objectives of the program can be described as distal and/or program outcomes [4].                                                                                                                                                                                               |
| Realism                                      | philosophy regarding the nature of reality that posits that a real world exists but our experience of it is filtered through our senses, culture and language [5].                                                                                                                                                                                                                                                                                                                                                                                                                                                      |
| Realist evaluation                           | An evaluation of a policy or program using an applied realist approach to make transparent how, why, when and for whom an intervention is effective. A realist evaluation uses a similar process as a realist review but uses primary data as evidence.                                                                                                                                                                                                                                                                                                                                                                 |
| Realist review or synthesis                  | A literature review using a realist approach. A realist review follows a similar process as a realist evaluation but uses secondary data as evidence.                                                                                                                                                                                                                                                                                                                                                                                                                                                                   |
| Refined program theory                       | The theory expressed as CMO explanations about how, why and for whom a program or intervention works based on the evidence and analysis from a realist review or evaluation.                                                                                                                                                                                                                                                                                                                                                                                                                                            |
| Substantive, formal or existing theory       | "...Existing theories within particular disciplines...used to help understand interventions. For example, in the social sciences theories may deal with topics such as 'cognitive development', 'deviance control', or any of the wider ambitions of interventions." [6]                                                                                                                                                                                                                                                                                                                                                |

References for Table S1: Glossary of terms

- [1] R. Pawson and N. Tilley, *Realistic Evaluation*. London: Sage, 1997.
- [2] T. Greenhalgh *et al.*, "Resource and training materials for realist evaluation." p. 44, 2017.
- [3] G. Westhorp, "Understanding Mechanisms in Realist Evaluation and Research," in *Doing Realist Research*, N. Emmel, Trisha Greenhalgh, A. Manzano, M. Monaghan, and S. Dalkin, Eds. London: SAGE, 2018, pp. 41–57.
- [4] Indiana University, "Glossary of Terms," *Shaping Outcomes*, 2006. [Online]. Available: <http://www.shapingoutcomes.org/course/glossary/index.htm>. [Accessed: 06-Aug-2020].
- [5] T. Greenhalgh *et al.*, "Philosophies and Evaluation Design • The RAMESES II Project," 2013. [Online]. Available: [http://www.ramesesproject.org/media/RAMESES\\_II\\_Philosophies\\_and\\_evaluation\\_design.pdf](http://www.ramesesproject.org/media/RAMESES_II_Philosophies_and_evaluation_design.pdf). [Accessed: 23-Sep-2017].
- [6] G. Wong, G. Westhorp, R. Pawson, and T. Greenhalgh, "Realist Synthesis. RAMESES Training Materials," *The RAMESES Project*, no. July 2013. RAMESES PROJECT, London, p. 55, 2013.

**Table S2.** Initial program theory\*.

| When /if                                                                                                     | Then participants/ health care (HC) workers will                                             | Resulting in                                                                                                |
|--------------------------------------------------------------------------------------------------------------|----------------------------------------------------------------------------------------------|-------------------------------------------------------------------------------------------------------------|
| On- line modules mirroring the classroom content are completed prior to the classroom sessions(s)            | learn and assimilate information through repetition and reinforcement                        | Increased knowledge of how to think about, prevent and manage violence                                      |
| Violence scenarios are generated by participants from their own experience and used for discussion           | learn information through envisioning how the content can be applied                         | Demonstration of the desired violence prevention, management and reporting actions                          |
| Information is given on the components and importance of risk assessment for violence                        | assume a belief that violence is not inevitable and can be prepared for and prevent violence | Violence risk assessment becoming part of normal care of patients                                           |
| Leaders follow up with HC workers after violence to inform actions to prevent further violence               | see reporting as worthwhile and have increased trust that actions will be taken              | Communication of risk of violence and formal and informal reporting                                         |
| Peers support each other during and after violence                                                           | trust that “someone has their back” and they are not alone                                   | Increased feelings of safety, less fear and more confidence to try new VP skills                            |
| HC workers have a heavy workload, multiple demands and lack of time                                          | likely feel overwhelmed and fatigued                                                         | Inability to apply knowledge to assess for, prevent and de-escalate violence                                |
| Thoughtful, non-blaming debrief sessions are held with HC workers after violent incidents on a routine basis | have reinforcement of the curriculum content applied to practice                             | Increased likelihood of integrating violence prevention into practice routine                               |
| Education focuses on self -awareness and participant role in communication to prevent violence               | self reflect on previous interactions and potential future situations                        | increased demonstration of reflexive behaviour and self-management in violent situations                    |
| Participants are given definitions and examples of what constitutes violence                                 | conceptualize and reframe violence to included unintended violence                           | Identification of violence from a new perspective and increased completion of risk assessment and reporting |

\*Developed from scoping of the literature and consultations with content experts prior to review.

**Table S3.** Supporting formal theory .

| Context                                                                                | Mechanism                                                    | Formal Theory                                                                        |
|----------------------------------------------------------------------------------------|--------------------------------------------------------------|--------------------------------------------------------------------------------------|
| 1. Education specific to clinical settings                                             | ↑ content valued as applicable to practice                   |                                                                                      |
| 2. Education focussed on communication & de-escalation                                 | ↑ self-awareness of emotions & communication                 |                                                                                      |
| 3. Unit level mentoring & modelling                                                    | ↑ Confidence in VP skills                                    | Self – efficacy theory (Bandura, 1982)                                               |
| 4. Team-based VP education & regular team discussions & decision making                | ↑ team trust & shared understanding                          | Team learning (A. Edmondson, 1999)                                                   |
| 5. Workload enabling meeting patient needs                                             | time/capacity for patient interaction                        | Job demand/ Resource Model (Bakker & Demerouti, 2007)                                |
| 6. Sufficient physical/emotional energy                                                | ↑ self-regulation of emotions                                |                                                                                      |
| 7. Physical support from supervisors & peers during violence                           | ↓ fear for personal safety & ↑ confidence to manage violence | Secondary psychological injury (Canadian Resource Centre for Victims of Crime, 2005) |
| 8. Acknowledgement & non blaming support from manager peers post violence              | ↑ perception of psychological safety                         | Risk of learning (A. C. Edmondson, 2008)                                             |
| 9. Clear supported policies with consequences for violence                             | empowerment to set limits & manage aggression                |                                                                                      |
| 10. Work culture free from judgement or blame                                          | ↓ fear of failure & being perceived incompetent              | Psychological safety (Samra, J, Gilbert, M. Shain, M., & Bilsker, 2012)              |
| 11. Consistent & timely violence follow-up; communication of VP actions after violence | ↓ cynicism & normalization of violence                       |                                                                                      |

References for supporting formal theory

Bakker, A. B., & Demerouti, E. (2007). The Job Demands-Resources model: state of the art. *Journal of Managerial Psychology*, 22(3), 309–328. <https://doi.org/10.1108/02683940710733115>.

Bandura, A. (1982). Self-Efficacy Mechanism in Human Agency. *American Psychologist*, 37(2), 122–147.

Canadian Resource Centre for Victims of Crime. (2005). *The Impact of Victimization*. Retrieved from <https://www.crcvc.ca/docs/victimization.pdf>

Edmondson, A. (1999). Psychological Safety and Learning Behavior in Work Teams. *Source: Administrative Science Quarterly*, 44(2), 350–383.

Edmondson, A. C. (2008). Managing the Risk of Learning: Psychological Safety in Work Teams. In *International Handbook of Organizational Teamwork and Cooperative Working* (pp. 255–275). <https://doi.org/10.1002/9780470696712.ch13>

Samra, J, Gilbert, M. Shain, M., & Bilsker, D. C. for A. R. in M. H. and A. (CARMHA). (2012). What is Psychological Health & Safety. *Guarding Minds @ Work*, pp. 1–2. Retrieved from [http://www.guardingmindsatwork.ca/docs/What\\_is\\_Psychological\\_Health\\_and\\_Safety.pdf](http://www.guardingmindsatwork.ca/docs/What_is_Psychological_Health_and_Safety.pdf)

**Table S4.** Included documents.

| Author(s)                                                                           | Year | Title                                                                                                                                                              | Publication                                                       |
|-------------------------------------------------------------------------------------|------|--------------------------------------------------------------------------------------------------------------------------------------------------------------------|-------------------------------------------------------------------|
| Adams, J., Knowles, A., Irons, G., Roddy, A., & Ashworth, J                         | 2017 | Assessing the effectiveness of clinical education to reduce the frequency and recurrence of workplace violence                                                     | Australian Journal of Advanced Nursing                            |
| Arnetz, J. E., & Arnetz, B. B.                                                      | 2000 | Implementation and evaluation of a practical intervention programme for dealing with violence towards health care workers                                          | Journal of Advanced Nursing                                       |
| Ashton, R. A., Morris, L., & Smith, I.                                              | 2018 | A qualitative meta-synthesis of emergency department staff experiences of violence and aggression                                                                  | International Emergency Nursing                                   |
| Baig, L., Tanzil, S., Shaikh, S., Hashmi, I., Khan, M. A., & Polkowski, M.          | 2018 | Effectiveness of training on de-escalation of violence and management of aggressive behavior faced by health care providers in a public sector hospital of Karachi | Pakistan Journal of Medical Sciences                              |
| Banerjee, A., Daly, T., Armstrong, H., Armstrong, P., Lafrance, S., & Szebehely, M. | 2008 | Out of control: Violence against personal support workers in long-term care                                                                                        | Report (CIHR Funded Project)                                      |
| Banerjee, A., Daly, T., Armstrong, P., Szebehely, M., Armstrong, H., & Lafrance, S. | 2012 | Structural violence in long-term, residential care for older people: Comparing Canada and Scandinavia                                                              | Social Science & Medicine                                         |
| Beech, B., & Leather, P.                                                            | 2006 | Workplace violence in the health care sector: A review of staff training and integration of training evaluation models                                             | Aggression & Violent Behaviour                                    |
| Björkdahl, A., Hansebo, G., & Palmstierna, T.                                       | 2013 | The influence of staff training on the violence prevention and management climate in psychiatric inpatient units                                                   | Journal of Psychiatric & Mental Health Nursing                    |
| Blando, J. D., O'Hagan, E., Casteel, C., Nocera, M. A., & Peek-Asa, C.              | 2013 | Impact of hospital security programmes and workplace aggression on nurse perceptions of safety                                                                     | Journal of Nursing Management                                     |
| Blando, J., Ridenour, M., Hartley, D., & Casteel, C.                                | 2014 | Barriers to effective implementation of programs for the prevention of workplace violence in hospitals                                                             | Online Journal Of Issues In Nursing                               |
| Blouin, S.                                                                          | 2017 | Taking a stand against workplace violence                                                                                                                          | Health Care Executive                                             |
| Bond, P., Paniagua, H., & Thompson, A.                                              | 2009 | Zero tolerance of violent patients: Policy in action                                                                                                               | Practice Nursing                                                  |
| Brophy, J. T., Keith, M. M., & Hurley, M.                                           | 2018 | Assaulted and Unheard: Violence Against Healthcare Staff                                                                                                           | New Solutions: A Journal of Environmental And Occupational Health |

|                                                                                                                     |      |                                                                                                                                                       |                                                                           |
|---------------------------------------------------------------------------------------------------------------------|------|-------------------------------------------------------------------------------------------------------------------------------------------------------|---------------------------------------------------------------------------|
| Cassidy, E. L., Rosen, C., Cook, J., Greenbaum, M. A., Chow, H., Solano, N., & Sheikh, J. I.                        | 2005 | Assessment to intervention: Utilizing a staff needs assessment to improve care for behaviorally challenging residents in long term care (Part I)      | Clinical Gerontologist                                                    |
| Chapman, R., Ogle, K. R., Martin, C., Rahman, A., Mckenna, B., & Barnfield, J.                                      | 2016 | Australian nurses' perceptions of the use of manual restraint in the Emergency Department: A qualitative perspective                                  | Journal of Clinical Nursing                                               |
| Chen, W. C., Huang, C. J., Chen, C. C., & Wang, J. D.                                                               | 2011 | The incidence and risk factors of workplace violence towards female nurses reported via internet in an acute psychiatric hospital                     | Archives of Environmental & Occupational Health                           |
| Child, Rebekah J. Howerton, and Elizabeth J. Sussman.                                                               | 2017 | Occupational Disappointment: Why Did I Even Become a Nurse?                                                                                           | Journal of Emergency Nursing                                              |
| Darling, F. E., Allen, D. E., de Nesnera, A., & Cummings, K.                                                        | 2011 | Transforming the culture of caring: Getting hurt is not part of the job                                                                               | Journal of Psychosocial Nursing                                           |
| Dickens, G., Rogers, G., Rooney, C., McGuinness, A., & Doyle, D.                                                    | 2009 | An audit of the use of breakaway techniques in a large psychiatric hospital: A replication study                                                      | Journal of Psychiatric and Mental Health Nursing                          |
| Duffin, C.                                                                                                          | 2010 | Researchers question the effectiveness of training staff in breakaway techniques                                                                      | Mental Health Practice                                                    |
| Duncan, S.M., Hyndamn, K., Estabrooks, C.A., Hesketh, K., Humphrey, C.K., Wong, J.S., Acorn, S. and Giovannetti, P. | 2016 | Nurses' experience of violence in Alberta and British Columbia hospitals                                                                              | Canadian Journal of Nursing Research                                      |
| Edmondson, A. C.                                                                                                    | 2008 | Managing the risk of learning: Psychological safety in work teams                                                                                     | International Handbook of Organizational Teamwork and Cooperative Working |
| Farrell, G. & Salmon, P.                                                                                            | 2010 | Challenging behaviour: An action plan for education and training                                                                                      | Contemporary Nurse                                                        |
| Farrell, G., & Cubit, K.                                                                                            | 2005 | Nurses under threat: a comparison of content of 28 aggression management programs                                                                     | International Journal of Mental Health Nursing                            |
| Forster, J. A., Petty, M. T., Schleiger, C., & Walters, H. C.                                                       | 2005 | kNOw workplace violence: developing programs for managing the risk of aggression in the health care setting                                           | The Medical Journal of Australia                                          |
| Gerdtz, M. F., Daniel, C., Dearie, V., Prematunga, R., Bamert, M., & Duxbury, J.                                    | 2013 | The outcome of a rapid training program on nurses' attitudes regarding the prevention of aggression in emergency departments: A multi-site evaluation | International Journal of Nursing Studies                                  |
| Gillespie, G. L., Farra, S. L., & Gates, D. M.                                                                      | 2014 | A workplace violence educational program: a repeated measures study                                                                                   | Nurse Education in Practice                                               |
| Gillespie, G. L., Gates, D. M., Kowalenko, T., Bresler, S., & Succop, P.                                            | 2014 | Implementation of a comprehensive intervention to reduce physical assaults and threats in the emergency department                                    | Emergency Nursing: JEN                                                    |
| Gillespie, G. L., Gates, D. M., Mentzel, T., Al-Natour, A., & Kowalenko, T.                                         | 2013 | Evaluation of a comprehensive ED violence prevention program                                                                                          | Journal of Emergency Nursing                                              |
| Gillespie, G. L., Gates, D. M., Miller, M., & Howard, P. K                                                          | 2010 | Workplace Violence in Healthcare Settings: Risk Factors and Protective Strategies                                                                     | Rehabilitation Nursing                                                    |
| Halm, M.                                                                                                            | 2017 | Aggression management education for acute care nurses- What's the evidence?                                                                           | American Journal of Critical Care                                         |
| Heckemann, B., Breimaier, H. E., Halfens, R. J. G., Schols, J. M. G. A., & Hahn, S.                                 | 2016 | The participant's perspective: learning from an aggression management training course for nurses. Insights from a qualitative interview study         | Scandinavian Journal of Caring Sciences                                   |
| Henderson, L., Kamp, B., Niedbalski, K., Abraham, S. P., & Gillum, D. R.                                            | 2018 | Nurses' Perspectives on Patient and Visitor Violence: A Qualitative Study                                                                             | International Journal of Studies in Nursing                               |
| Hills, D.                                                                                                           | 2008 | Relationships between aggression management training, perceived self-efficacy and rural general hospital nurses' experiences of patient aggression    | Contemporary Nurse.                                                       |

|                                                                                                                         |      |                                                                                                                                                                         |                                                          |
|-------------------------------------------------------------------------------------------------------------------------|------|-------------------------------------------------------------------------------------------------------------------------------------------------------------------------|----------------------------------------------------------|
| Ilkiw-Lavalle, O., Grenyer, B. F., & Graham, L.                                                                         | 2012 | Does prior training and staff occupation influence knowledge acquisition from an aggression management-training program?                                                | International Journal of Mental Health Nursing           |
| Jussab, F., & Murphy, H.                                                                                                | 2015 | "I just can't, I am frightened for my safety, I don't know how to work with her": Practitioners' experiences of client violence and recommendations for future practice | Professional Psychology: Research & Practice             |
| Kansagra, S.M., Rao, S.R., Sullivan, A.F., Gordon, J.A., Magid, D.J., Kaushal, R., Camargo, Jr, C.A. and Blumenthal, D. | 2008 | A survey of workplace violence across 65 US emergency departments                                                                                                       | Academic Emergency Medicine                              |
| Koller, L. H.                                                                                                           | 2016 | It could never happen here: promoting violence prevention education for emergency department nurses                                                                     | Journal of Continuing Education                          |
| Lanctôt, N., & Guay, S.                                                                                                 | 2014 | The aftermath of workplace violence among healthcare workers: A systematic literature review of the consequences                                                        | Aggression and Violent Behavior                          |
| Lanza, M., Schmidt, S., & Mcmillan, F., Demaio, J., & Forester, L.                                                      | 2011 | Support Our Staff-A Unique Program to Help Deal With Patient Assault.                                                                                                   | Perspectives in Psychiatric Care                         |
| Leadbetter, D.                                                                                                          | 2007 | Challenging behaviour: Whose problem is it?                                                                                                                             | Nursing & Residential Care                               |
| Lee, B., Del Rosario, K., & Byron-Iyamah, C.                                                                            | 2017 | Incorporating Relationship-Based Care Into a Nurse Education Program for Managing Disruptive Patient Behaviors                                                          | Clinical Nurse Specialist CMS                            |
| Luck, L., Jackson, D., & Usher, K.                                                                                      | 2008 | Innocent or culpable? Meanings that emergency department nurses ascribe to individual acts of violence                                                                  | Journal of Clinical Nursing                              |
| MacGabhann, L.                                                                                                          | 2002 | Prevention and management of violence: Implementing clinically effective practice                                                                                       | Mental Health Practice                                   |
| Marshall, B., Craig, A., & Meyer, A.                                                                                    | 2017 | Registered nurses' attitudes towards, and experiences of, aggression and violence in the acute hospital setting                                                         | Kai Tiaki Nursing Research                               |
| Martinez, A. J. S                                                                                                       | 2016 | Managing Workplace Violence with Evidence-Based Interventions: a Literature Review                                                                                      | Journal of Psychosocial Nursing & Mental Health Services |
| Moylan, L.                                                                                                              | 2015 | A Conceptual Model for Nurses Decision-making with the Aggressive Psychiatric Patient.                                                                                  | Issues in Mental Health Nursing                          |
| Needham, I., Abderhalden, C., Halfens, R. J., Fischer, J. E., & Dassen, T.                                              | 2005 | Non-somatic effects of patient aggression on nurses: a systematic review                                                                                                | Journal of Advanced Nursing                              |
| O'Grady, E., Dempsey, L., & Fabby, C.                                                                                   | 2012 | Anger: a common form of psychological distress among patients at the end of life                                                                                        | International Journal of Palliative Nursing              |
| Parish, C.                                                                                                              | 2013 | Change ward culture to cut violence and aggression                                                                                                                      | Mental Health Practice                                   |
| Paterson, B., Leadbetter, D., & Bowie, V.                                                                               | 1999 | Supporting nursing staff exposed to violence at work                                                                                                                    | International Journal of Nursing Studies                 |
| Pich, J., Hazelton, M., Sundin, D., & Kable, A.                                                                         | 2010 | Patient-related violence against emergency department nurses                                                                                                            | Nursing & Health Sciences                                |
| Price, O., Baker, J., Bee, P., & Lovell, K.                                                                             | 2015 | Learning and performance outcomes of mental health staff training in de-escalation techniques for the management of violence and aggression                             | British Journal of Psychiatry                            |
| Renker, P., Scribner, S. A., & Huff, P.                                                                                 | 2015 | Staff perspectives of violence in the emergency department: Appeals for consequences, collaboration, and consistency                                                    | Work                                                     |
| Rosenau, B.                                                                                                             | 2017 | Violence Prevention and Nurse Safety                                                                                                                                    | Canadian Nurse                                           |
| Sato, K., Wakabayashi, T., Kiyoshi-Teo, H., & Fukahori, H                                                               | 2013 | Factors associated with nurses' reporting of patients' aggressive behavior: A cross-sectional survey                                                                    | Journal of Nursing Management                            |
| Stevenson, K. N., Jack, S. M., O'Mara, L., & LeGris, J.                                                                 | 2015 | Registered nurses' experiences of patient violence on acute care psychiatric inpatient units: an interpretive descriptive study                                         | BMC Nursing                                              |
| Stubbs, B., & Dickens, G.                                                                                               | 2008 | Prevention and management of aggression in mental health: an interdisciplinary discussion                                                                               | International Journal of Therapy & Rehabilitation        |

|                                                                                                         |      |                                                                                                                                                                  |                                                                 |
|---------------------------------------------------------------------------------------------------------|------|------------------------------------------------------------------------------------------------------------------------------------------------------------------|-----------------------------------------------------------------|
| Sturrock, A.                                                                                            | 2010 | Restraint in inpatient areas: the experiences of service users                                                                                                   | Mental Health Practice                                          |
| Tölli, S., Partanen, P., Kontio, R., & Häggman-Laitila, A.                                              | 2017 | A quantitative systematic review of the effects of training interventions on enhancing the competence of nursing staff in managing challenging patient behaviour | Journal of Advanced Nursing                                     |
| Vandecasteele, T., Van Hecke, A., Duprez, V., Beeckman, D., Debyser, B., Grypdonck, M., & Verhaeghe, S. | 2017 | The influence of team members on nurses' perceptions of transgressive behaviour in care relationships: A qualitative study                                       | Journal of advanced nursing                                     |
| Wang, S., O'Brien-Pallas, L. L., & Hayes, L.                                                            | 2008 | A review and evaluation of workplace violence prevention programs in the health sector                                                                           | Nursing Health Services Research Unit                           |
| Whitman, E.                                                                                             | 2016 | Frequent violence in the ED doesn't have to be part of the job                                                                                                   | Modern Healthcare                                               |
| Zarola, A., & Leather, P.                                                                               | 2006 | Violence and aggression management training for trainers and managers A national evaluation of the training provision in healthcare settings                     | Report prepared for the Health and Safety Executive, Nottingham |

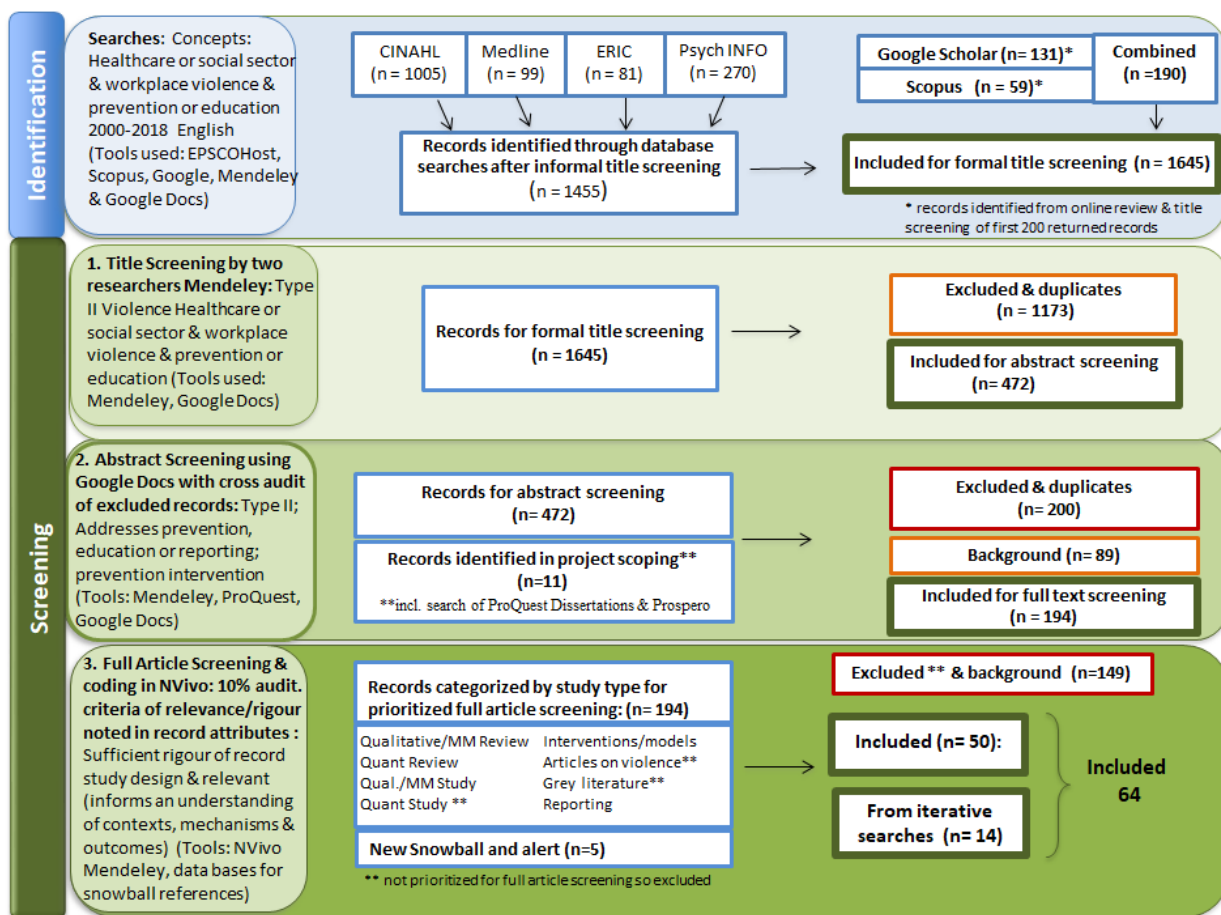

Figure S1: Search and screening strategy

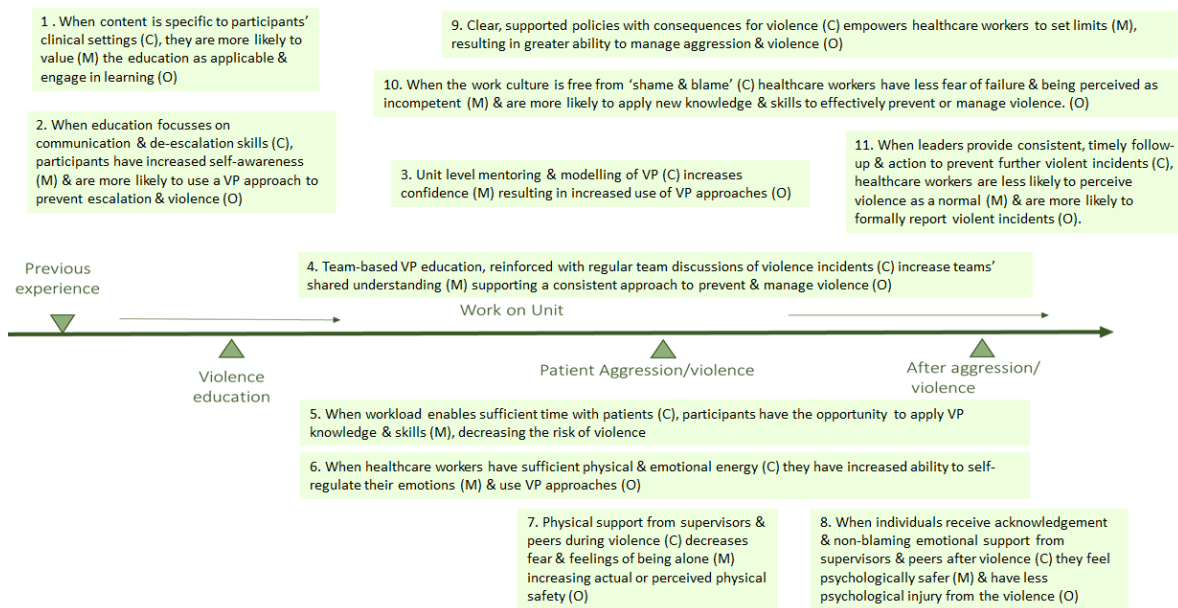

Figure S2 Review refined program theory
